# Supplementary material for: WSi2 nanodot reinforced Si particles as anodes for high performance lithium-ion batteries
Source: Royal Society of Chemistry journal article supplement (doi:10.1039/d0ce01047b), 2020-01-01
Supplement: d0ce01047b1.pdf [file d0ce01047b1.pdf]

## Supplementary Material

### **WSi<sub>2</sub> nanodots reinforced Si particles as anodes for high performance lithium-ion batteries**

Xiangyang Zhou, Chucheng Luo, Jing Ding, Juan Yang\* and Jingjing Tang\*

School of Metallurgy and Environment, Central South University, Changsha 410083, China.

\* Corresponding author.

E-mail address: [tangjj@csu.edu.cn](mailto:tangjj@csu.edu.cn).

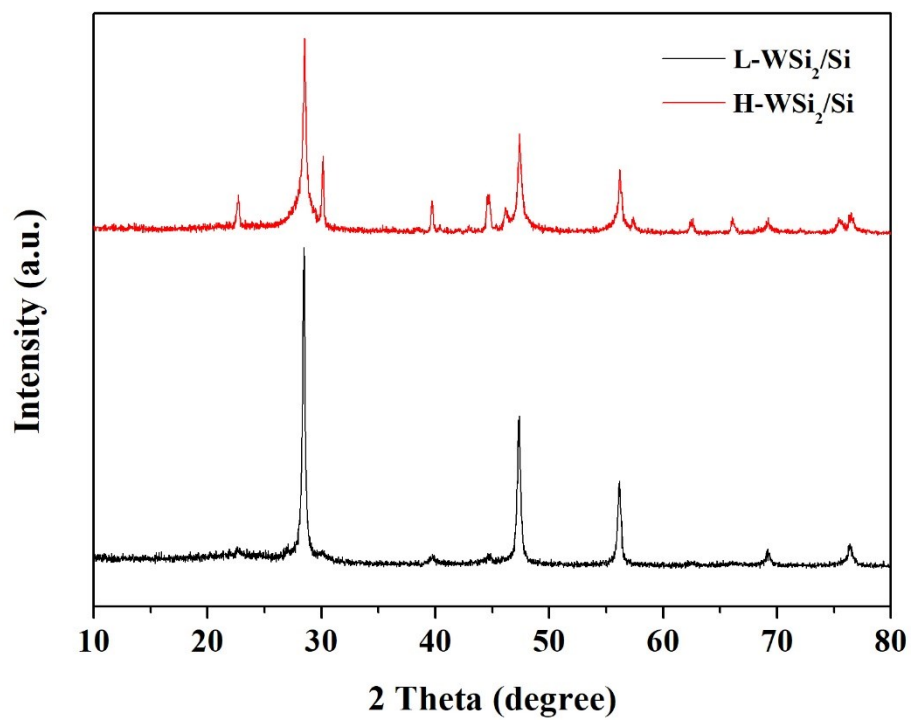

**Fig. S1** XRD patterns of H-WSi<sub>2</sub>/Si and L-WSi<sub>2</sub>/Si.

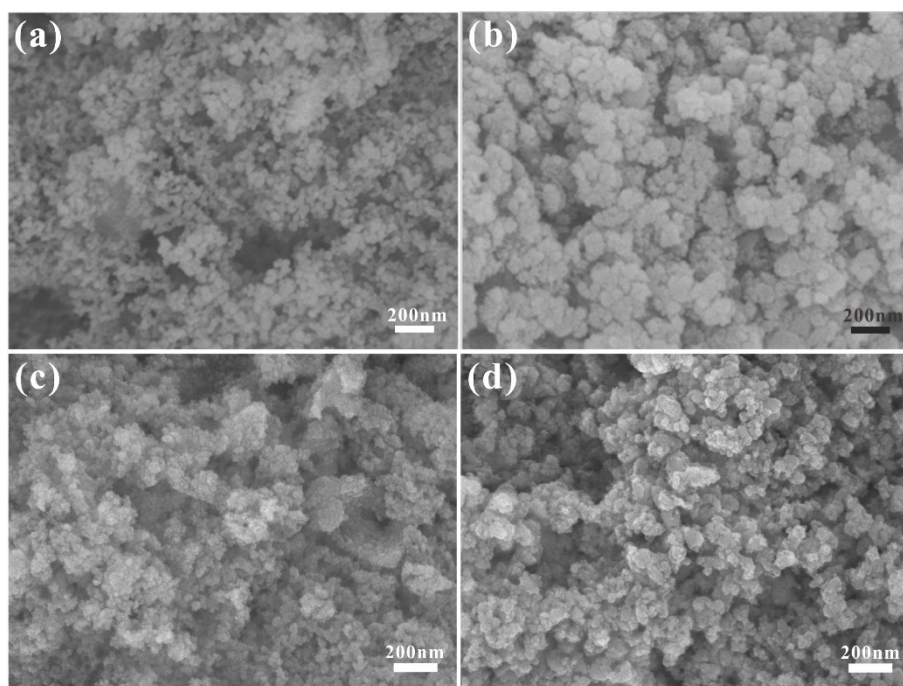

**Fig. S2** SEM images of SiO<sub>2</sub> (a), p-Si (b), H-WSi<sub>2</sub>/Si (c), L-WSi<sub>2</sub>/Si (d).

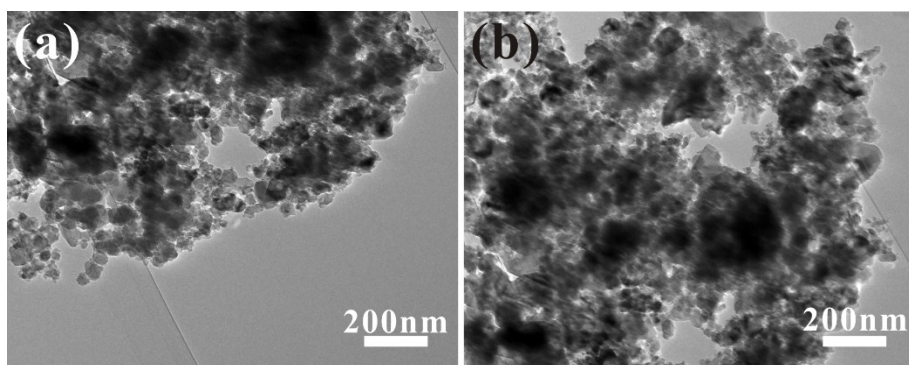

**Fig. S3** TEM images of H-WSi<sub>2</sub>/Si (a), L-WSi<sub>2</sub>/Si (b).

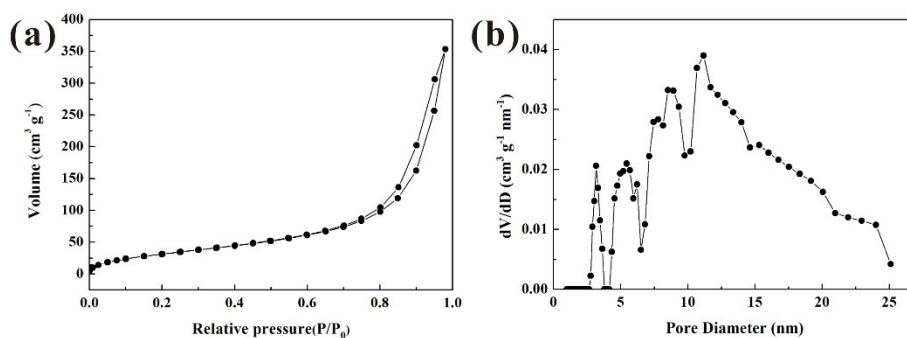

**Fig. S4** N<sub>2</sub> adsorption/desorption curve (a) and pore size distributions of WSi<sub>2</sub>/Si obtained from desorption data.

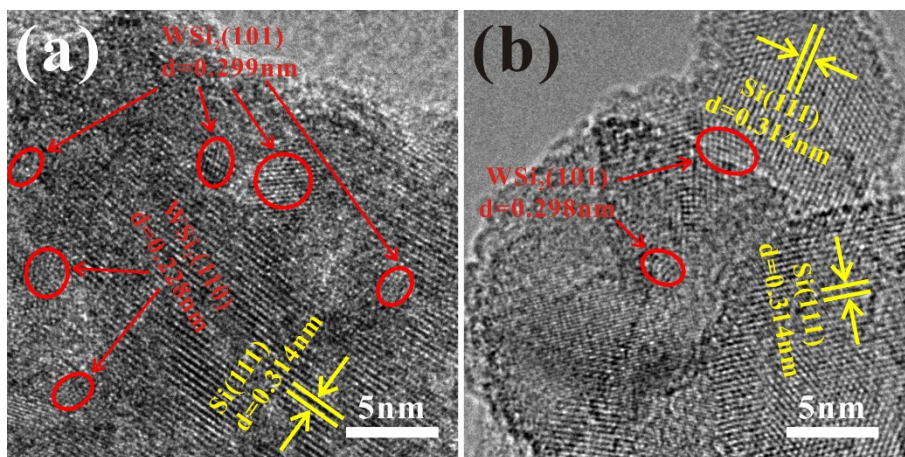

**Fig. S5** HRTEM image of H-WSi<sub>2</sub>/Si (a), L-WSi<sub>2</sub>/Si (b).

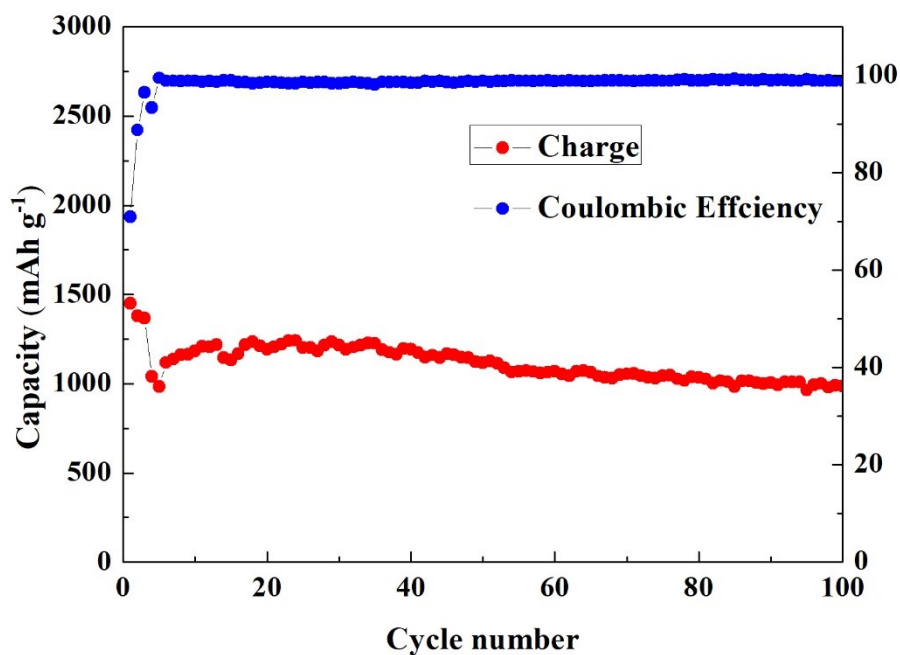

**Fig. S6** Cycling performances at 0.2C of WSi<sub>2</sub>/Si with a mass loading of ~1.45 mg cm<sup>-2</sup>.

**Table S1** Tungsten content in samples based on ICP

|                                   | Weight percent of W<br>in this sample, % | Weight percent of WSi <sub>2</sub><br>in this sample, % | Main element<br>in this sample |
|-----------------------------------|------------------------------------------|---------------------------------------------------------|--------------------------------|
| WO <sub>3</sub> -SiO <sub>2</sub> | 4.83                                     | 0                                                       | Si, O, W                       |
| WSi <sub>2</sub> /Si              | 5.75                                     | 7.51                                                    | Si, W                          |
| H-WSi <sub>2</sub> /Si            | 12.6                                     | 16.45                                                   | Si, W                          |
| L-WSi <sub>2</sub> /Si            | 1.75                                     | 2.28                                                    | Si, W                          |

**Table S2** Comparison of electrochemical performance of Si-based anodes in previous work and in this work.

| Sample                             | Current<br>density(mA/g) | Voltage<br>range (V) | Cycle<br>No. | charge<br>capacity<br>(mAh/g) | Ref.         |
|------------------------------------|--------------------------|----------------------|--------------|-------------------------------|--------------|
| TiSi <sub>2</sub> /Si              | 500                      | 0.01-1.2             | 100          | 1161                          | [1]          |
| DSM/Si                             | 100                      | 0.01-1.5             | 100          | 1137                          | [2]          |
| Sn <sub>15</sub> /Si <sub>85</sub> | 200                      | 0.01-1.5             | 70           | 1544.7                        | [3]          |
| SiC/Si                             | 500                      | 0.01-1.2             | 100          | 1670                          | [4]          |
| BHP/Si                             | 840                      | 0.01-1.2             | 150          | 1400                          | [5]          |
| MoSi <sub>2</sub> /Si              | 840                      | 0.01-1.2             | 150          | 1647.3                        | [6]          |
| SiC/C/Si                           | 500                      | 0.01-1.5             | 550          | 1050                          | [7]          |
| MgSi <sub>2</sub> /C               | 100                      | 0.02-2               | 500          | 451.8                         | [8]          |
| WSi <sub>2</sub> /Si               | 840                      | 0.01-1.2             | 200          | 1504.8                        | This<br>work |

**Table S3** The impedance parameters of the samples before cycling

| Sample               | $R_o$ ( $\Omega$ ) | $R_{ct}$ ( $\Omega$ ) | $D_{Li^+}$ ( $m^2 s^{-1}$ ) |
|----------------------|--------------------|-----------------------|-----------------------------|
| Si                   | 3.784              | 244.2                 | $3.45 \times 10^{-22}$      |
| WSi <sub>2</sub> /Si | 2.094              | 91.14                 | $3.66 \times 10^{-21}$      |

## References

- 1 F. Li, Z. Wang, W. Liu, T. Yan, C. Zhai, P. Wu and Y. Zhou, *ACS Applied Energy Materials*, 2019, **2**, 2268-2275.
- 2 Y. Yang, C. Ni, M. Gao, J. Wang, Y. Liu and H. Pan, *Energy Storage Materials*, 2018, **14**, 279-288.
- 3 Q. Hao, J. Hou, J. Ye, H. Yang, J. Du and C. Xu, *Electrochimica Acta*, 2019, **306**, 427-436.
- 4 J. Zhang, J. Tang, X. Zhou, M. Jia, Y. Ren, M. Jiang, T. Hu and J. Yang, *ChemElectroChem*, 2019, **6**, 450-455.
- 5 Y. Ren, X. Zhou, J. Tang, J. Ding and J. Yang, *Inorganic Chemistry*, 2019, **58**, 4592-4599.
- 6 L. Wu, J. Yang, X. Zhou, J. Tang, Y. Ren and Y. Nie, *Acs Appl Mater Interfaces*, 2016, **8**, 16862.
- 7 C. Yu, X. Chen, Z. Xiao, C. Lei, C. Zhang, X. Lin, B. Shen, R. Zhang and F. Wei, *Nano letters*, 2019, **19**, 5124-5132.
- 8 A. G. Tamirat, M. Hou, L. Yao, B. Duan and Y. Xia, *Journal of Power Sources*, 2018, **384**.
